# Supplementary material for: Inverse correlates of COVID-19 mortality across European countries during the first versus subsequent waves
Source: PubMed Central journal article supplement — BMJ Glob Health. 2021 Aug 9;6(8):e006422. doi: 10.1136/bmjgh-2021-006422 (PMC8354758; doi:10.1136/bmjgh-2021-006422), 2021-08-09
Supplement: bmjgh-2021-006422supp001.pdf [file bmjgh-2021-006422supp001.pdf]

**Table S1.** Description and source of socio-demographic and health status, healthcare resources and facilities, and the COVID-19 response indicators

| Indicators                                                  | Description                                                                                                                                                                                                                                                                                                                                                                                                                             | Source and last date available                                                                                                                                                                                                                                          |
|-------------------------------------------------------------|-----------------------------------------------------------------------------------------------------------------------------------------------------------------------------------------------------------------------------------------------------------------------------------------------------------------------------------------------------------------------------------------------------------------------------------------|-------------------------------------------------------------------------------------------------------------------------------------------------------------------------------------------------------------------------------------------------------------------------|
| Human Development Index (HDI)                               | HDI is a summary measure of average achievement in three key dimensions of human development: long and healthy life, being knowledgeable and standard of living. The HDI is the sum of these three dimensions indexes: life expectancy index, education index and gross national income index.                                                                                                                                          | United Nations Development programme. Human development Reports. Available at: <a href="http://hdr.undp.org/en/composite/HDI">http://hdr.undp.org/en/composite/HDI</a> . Last data available refer to 2019.                                                             |
| Life expectancy at birth                                    | Life expectancy at birth is defined as the mean number of years still to be lived by a person at birth, if subjected throughout the rest of his or her life to the current mortality conditions.                                                                                                                                                                                                                                        | United Nations Development programme. Human development Reports. Available at: <a href="http://hdr.undp.org/en/composite/HDI">http://hdr.undp.org/en/composite/HDI</a> . Last data available refer to 2019.                                                             |
| Proportion of people at risk of poverty or social exclusion | This indicator corresponds to the sum of persons who are at risk of poverty or severely materially deprived or living in households with very low work intensity. At risk-of-poverty are persons with an equivalized disposable income below the risk-of-poverty threshold, which is set at 60 % of the national median equivalized disposable income. Material deprivation covers indicators relating to economic strain and durables. | Eurostat Database. Available at: <a href="https://ec.europa.eu/eurostat/databrowser/view/t2020_5_0/default/table?lang=en">https://ec.europa.eu/eurostat/databrowser/view/t2020_5_0/default/table?lang=en</a><br>Last data available refer to 2019 (UK and Island 2018). |
| Healthy life years (HLY)                                    | HLY at birth is defined as the number of years that a person is expected to live in a healthy condition.                                                                                                                                                                                                                                                                                                                                | Eurostat Database. Available at: <a href="https://ec.europa.eu/eurostat/databrowser/view/hlth_hlye/default/table?lang=en">https://ec.europa.eu/eurostat/databrowser/view/hlth_hlye/default/table?lang=en</a><br>Last data available refer to 2019 (UK 2018).            |
| Population density                                          | Population density refers to the number of people per squared km of land area in the country.                                                                                                                                                                                                                                                                                                                                           | The World Bank Available at: <a href="https://data.worldbank.org/indicator/EN.POP.DNST?viw=map">https://data.worldbank.org/indicator/EN.POP.DNST?viw=map</a> . Last data available refers to 2018.                                                                      |
| Proportion of urbanization                                  | This indicator represents the proportion of population of urban areas on the total population of the country.                                                                                                                                                                                                                                                                                                                           | United Nations. Department of Economics and Social Affairs. Available at: <a href="https://population.un.org/wup/Download/">https://population.un.org/wup/Download/</a> . Last data available refers to 2018.                                                           |
| Number of hospital beds/100,000 inhabitants                 | This indicator refers to the number of total available beds in hospitals /100,000 inhabitants.                                                                                                                                                                                                                                                                                                                                          | Eurostat Database. Available at: <a href="https://ec.europa.eu/eurostat/databrowser/view/hlth_rs_bds/default/table?lang=en">https://ec.europa.eu/eurostat/databrowser/view/hlth_rs_bds/default/table?lang=en</a> .<br>Last data available refer to 2018 (Germany 2017)  |
| Intensive Care Units (ICU) beds/100,000 inhabitants         | This indicator refers to the number of total available ICU beds / 100,000 inhabitants.                                                                                                                                                                                                                                                                                                                                                  | Organization for Economic Co-operation and Development (OECD), European Observatory on Health Systems and Policies – The Health System Response Monitor (HSRM) and scientific papers. Available at:                                                                     |

|                                                   |                                                                                                                                                                                                                                                                                                                                                                                                                                                   |                                                                                                                                                                                                                                                                                                                                                                                                                                                                                                                                                                                                                                                                                                                                                                                                                                                                                                            |
|---------------------------------------------------|---------------------------------------------------------------------------------------------------------------------------------------------------------------------------------------------------------------------------------------------------------------------------------------------------------------------------------------------------------------------------------------------------------------------------------------------------|------------------------------------------------------------------------------------------------------------------------------------------------------------------------------------------------------------------------------------------------------------------------------------------------------------------------------------------------------------------------------------------------------------------------------------------------------------------------------------------------------------------------------------------------------------------------------------------------------------------------------------------------------------------------------------------------------------------------------------------------------------------------------------------------------------------------------------------------------------------------------------------------------------|
|                                                   |                                                                                                                                                                                                                                                                                                                                                                                                                                                   | <p><a href="https://www.oecd.org/coronavirus/en/data-insights/intensive-care-beds-capacity">https://www.oecd.org/coronavirus/en/data-insights/intensive-care-beds-capacity</a>;</p> <p><a href="https://www.tandfonline.com/doi/full/10.1080/17453054.2020.1768830">https://www.tandfonline.com/doi/full/10.1080/17453054.2020.1768830</a></p> <p><a href="https://www.covid19healthsystem.org/mainpage.aspx">https://www.covid19healthsystem.org/mainpage.aspx</a></p> <p>Bauer, J., Brüggmann, D., Klingelhöfer, D., et al (2020). Access to intensive care in 14 European countries: a spatial analysis of intensive care need and capacity in the light of COVID-19. <i>Intensive care medicine</i>, 46(11), 2026-2034.</p> <p>Rhodes, A., Ferdinande, P., Flaatten, H., et al. (2012). The variability of critical care bed numbers in Europe. <i>Intensive care medicine</i>, 38(10), 1647-1653.</p> |
| Percentage of health expenditure on the total GDP | This indicator reports the percentage of health expenditure on the total GDP for each country.                                                                                                                                                                                                                                                                                                                                                    | <p>Eurostat Database. Available at:</p> <p><a href="https://ec.europa.eu/eurostat/web/products-eurostat-news/-/DDN-20201202-1">https://ec.europa.eu/eurostat/web/products-eurostat-news/-/DDN-20201202-1</a>.</p> <p>Last data available refer to 2018.</p>                                                                                                                                                                                                                                                                                                                                                                                                                                                                                                                                                                                                                                                |
| Stringency Index                                  | This index was developed by the University of Oxford. It is a composite measure based on nine response indicators including school closures, workplace closures, and travel bans, rescaled to a value from 0 to 100 (100 = strictest). We calculated the average of these values for the first and the subsequent waves for each country.                                                                                                         | <p>University of Oxford. Available at:</p> <p><a href="https://www.bsg.ox.ac.uk/research/research-projects/covid-19-government-response-tracker">https://www.bsg.ox.ac.uk/research/research-projects/covid-19-government-response-tracker</a></p>                                                                                                                                                                                                                                                                                                                                                                                                                                                                                                                                                                                                                                                          |
| Mobility Retail and Recreation                    | This indicator compares the mobility for Retail and Recreation during the COVID-19 period and the baseline (given as median value over the five-week period from January 3 <sup>rd</sup> to February 6 <sup>th</sup> 2020). It includes places like restaurants, cafes, shopping centers, theme parks, museums, libraries, and movie theaters. We calculated the average of these values for the first and the subsequent waves for each country. | <p>Our World in Data. Available at:</p> <p><a href="https://ourworldindata.org/covid-google-mobility-trends">https://ourworldindata.org/covid-google-mobility-trends</a>.</p> <p>Data are not available for Island and Ireland.</p>                                                                                                                                                                                                                                                                                                                                                                                                                                                                                                                                                                                                                                                                        |
| Mobility Transit                                  | This indicator compares the public transport mobility during the COVID-19 period and the baseline (given as median value over the five-week period from January 3 <sup>rd</sup> to February 6 <sup>th</sup> 2020). It includes the mobility in public transport hubs such as subway, bus, and train stations. We calculated the average of these values for the first and the subsequent waves for each country.                                  | <p>Our World in Data. Available at:</p> <p><a href="https://ourworldindata.org/covid-google-mobility-trends">https://ourworldindata.org/covid-google-mobility-trends</a>.</p> <p>Data are not available for Island and Ireland.</p>                                                                                                                                                                                                                                                                                                                                                                                                                                                                                                                                                                                                                                                                        |

|                                  |                                                                                                                                                                                                                                                                                                                                                                                                                                       |                                                                                                                                                                                                                                                                                                                  |
|----------------------------------|---------------------------------------------------------------------------------------------------------------------------------------------------------------------------------------------------------------------------------------------------------------------------------------------------------------------------------------------------------------------------------------------------------------------------------------|------------------------------------------------------------------------------------------------------------------------------------------------------------------------------------------------------------------------------------------------------------------------------------------------------------------|
| Mobility Outdoor                 | This indicator compares the outdoor mobility during the COVID-19 period and the baseline (given as median value over the five-week period from January 3 <sup>rd</sup> to February 6 <sup>th</sup> 2020). It includes the mobility in local parks, national parks, public beaches, marinas, dog parks, plazas, and public gardens. We calculated the average of these values for the first and the subsequent waves for each country. | Our World in Data. Available at: <a href="https://ourworldindata.org/covid-google-mobility-trends">https://ourworldindata.org/covid-google-mobility-trends</a> .<br>Data are not available for Island and Ireland.                                                                                               |
| Total tests per 1000 inhabitants | This indicator refers to the total number of tests done per population (1000 inhabitants).                                                                                                                                                                                                                                                                                                                                            | Our World in Data. Available at: <a href="https://ourworldindata.org/coronavirus-testing">https://ourworldindata.org/coronavirus-testing</a> . Data are not available for Czechia, France and Sweden.                                                                                                            |
| New tests per 1000 inhabitants   | This indicator refers to the new tests per 1000 inhabitants. We calculated the average of these values for the first and the subsequent waves for each country.                                                                                                                                                                                                                                                                       | Our World in Data. Available at: <a href="https://ourworldindata.org/grapher/daily-tests-per-thousand-people-smoothed-7-day">https://ourworldindata.org/grapher/daily-tests-per-thousand-people-smoothed-7-day</a> . Data are not available for Czechia, Germany, Netherlands and Spain.                         |
| Tourism                          | This indicator calculates the nights spent at tourist accommodation establishments by residents/non-residents for each country. We used the sum of March and April 2020 for the first wave analysis and the sum of August and September 2020 for the subsequent waves analysis. Thus, we adjust these values per million population.                                                                                                  | Eurostat Database. Available at: <a href="https://ec.europa.eu/eurostat/databrowser/view/tin00171/default/table?lang=en">https://ec.europa.eu/eurostat/databrowser/view/tin00171/default/table?lang=en</a><br>Data for France and Ireland are not available. Data for UK were available only for the first wave. |

**Table S2.** Socio-demographic and health status, and healthcare resources and facilities indicators in the EU/EEA Countries plus UK and Switzerland

| Country        | HDI   | Life expectancy at birth | Poverty and social exclusion | HLY  | Population density | Percentage of urbanization | Percentage of health expenditure on the total GDP | Hospital beds/100.000 | ICU beds/100.000 |
|----------------|-------|--------------------------|------------------------------|------|--------------------|----------------------------|---------------------------------------------------|-----------------------|------------------|
| Austria        | 0.922 | 81.5                     | 16.9                         | 57.3 | 107.1              | 58.3                       | 10.3                                              | 727.2                 | 28.9             |
| Belgium        | 0.931 | 81.6                     | 19.5                         | 62.4 | 377.4              | 98.0                       | 10.3                                              | 562.2                 | 17.4             |
| Bulgaria       | 0.816 | 75.1                     | 32.8                         | 66.3 | 64.7               | 75.0                       | 7.4                                               | 756.9                 | 27.0             |
| Croatia        | 0.851 | 78.5                     | 23.3                         | 57.4 | 72.2               | 56.9                       | 6.8                                               | 561.3                 | 9.8              |
| Cyprus         | 0.887 | 81.0                     | 22.3                         | 62.5 | 128.7              | 66.8                       | 6.8                                               | 330.1                 | 6.1              |
| Czechia        | 0.900 | 79.4                     | 12.5                         | 62.0 | 137.7              | 73.8                       | 7.7                                               | 661.8                 | 41.9             |
| Denmark        | 0.940 | 80.9                     | 16.3                         | 58.9 | 144.8              | 87.9                       | 10.1                                              | 243.0                 | 7.8              |
| Estonia        | 0.892 | 78.8                     | 24.3                         | 55.8 | 30.4               | 68.9                       | 6.7                                               | 457.4                 | 36.3             |
| Finland        | 0.938 | 81.9                     | 15.6                         | 56.4 | 18.1               | 85.4                       | 9.0                                               | 361.2                 | 5.4              |
| France         | 0.901 | 82.7                     | 17.9                         | 64.1 | 122.3              | 80.4                       | 11.3                                              | 590.9                 | 16.3             |
| Germany        | 0.947 | 81.3                     | 17.4                         | 66.3 | 237.3              | 77.3                       | 11.5                                              | 800.2                 | 33.9             |
| Greece         | 0.888 | 82.2                     | 30.0                         | 66.0 | 83.3               | 79.1                       | 7.7                                               | 419.8                 | 5.3              |
| Hungary        | 0.860 | 76.9                     | 18.9                         | 61.7 | 107.1              | 71.4                       | 6.7                                               | 701.3                 | 11.2             |
| Iceland        | 0.949 | 83.0                     | 11.0                         | 62.4 | 3.5                | 93.8                       | 8.5                                               | 287.5                 | 9.1              |
| Ireland        | 0.955 | 82.3                     | 20.6                         | 69.6 | 70.7               | 63.2                       | 6.9                                               | 297.4                 | 5.0              |
| Italy          | 0.892 | 83.5                     | 25.6                         | 68.3 | 202.9              | 70.4                       | 8.7                                               | 314.1                 | 8.6              |
| Latvia         | 0.866 | 75.3                     | 27.3                         | 53.1 | 31.0               | 68.1                       | 6.2                                               | 549.4                 | 9.7              |
| Lithuania      | 0.882 | 75.9                     | 26.3                         | 57.5 | 44.7               | 67.7                       | 6.6                                               | 643.4                 | 23.0             |
| Luxembourg     | 0.916 | 82.3                     | 20.6                         | 62.6 | 250.2              | 91.0                       | 5.3                                               | 450.7                 | 20.7             |
| Malta          | 0.895 | 82.5                     | 20.1                         | 73.2 | 1514.5             | 94.6                       | 9.0                                               | 430.8                 | 19.4             |
| Netherlands    | 0.944 | 82.3                     | 16.5                         | 61.0 | 511.8              | 91.5                       | 10.0                                              | 316.6                 | 6.7              |
| Norway         | 0.957 | 82.4                     | 16.1                         | 69.8 | 14.6               | 82.2                       | 10.1                                              | 352.7                 | 8.5              |
| Poland         | 0.880 | 78.7                     | 18.2                         | 62.5 | 124.0              | 60.1                       | 6.3                                               | 653.7                 | 10.1             |
| Portugal       | 0.864 | 82.1                     | 21.6                         | 59.2 | 112.3              | 65.2                       | 9.5                                               | 344.5                 | 5.7              |
| Romania        | 0.828 | 76.1                     | 31.2                         | 60.2 | 84.6               | 54.0                       | 5.6                                               | 696.8                 | 3.8              |
| Slovakia       | 0.860 | 77.5                     | 16.4                         | 56.2 | 113.3              | 53.7                       | 6.7                                               | 569.6                 | 14.9             |
| Slovenia       | 0.917 | 81.3                     | 14.4                         | 60.9 | 103.0              | 54.5                       | 8.3                                               | 442.8                 | 27.7             |
| Spain          | 0.904 | 83.6                     | 25.3                         | 69.9 | 93.7               | 80.3                       | 9.0                                               | 297.2                 | 9.7              |
| Sweden         | 0.945 | 82.8                     | 18.8                         | 73.3 | 25.0               | 87.4                       | 10.9                                              | 213.8                 | 5.0              |
| Switzerland    | 0.955 | 83.8                     | 18.8                         | 60.6 | 215.5              | 73.8                       | 11.9                                              | 462.8                 | 11.8             |
| United Kingdom | 0.932 | 81.3                     | 23.1                         | 61.2 | 274.7              | 83.4                       | 10.0                                              | 249.5                 | 10.5             |

**Table S3.** COVID-19 response indicators in in the EU/EEA Countries plus UK and Switzerland

| Country        | Average of Stringency Index |                  | Average of mobility Retail and Recreation |                  | Average of mobility Transit |                  | Average of mobility Outdoor |                  | Total tests per 1000 |                  | Average of new tests per 1000 |                  | Tourism per 1,000,000 |                  |
|----------------|-----------------------------|------------------|-------------------------------------------|------------------|-----------------------------|------------------|-----------------------------|------------------|----------------------|------------------|-------------------------------|------------------|-----------------------|------------------|
|                | first wave                  | subsequent waves | first wave                                | subsequent waves | first wave                  | subsequent waves | first wave                  | subsequent waves | first wave           | subsequent waves | first wave                    | subsequent waves | first wave            | subsequent waves |
|                | Austria                     | 53.2             | 67.4                                      | -29.2            | -38.4                       | -31.2            | -32.2                       | 28.2             | 15.4                 | 115.2            | 5719.9                        | 0.8              | 18.7                  | 3.83             |
| Belgium        | 62.5                        | 58.1             | -33.1                                     | -30.2            | -36.5                       | -29.5            | 30.0                        | 34.8             | 177.3                | 1114.7           | 1.0                           | 3.6              | 0.47                  | 1.6              |
| Bulgaria       | 51.9                        | 49.7             | -19.1                                     | -22.6            | -23.3                       | -5.6             | 26.1                        | 21.6             | 48.9                 | 396.4            | 0.4                           | 1.3              | 0.15                  | 2.2              |
| Croatia        | 60.0                        | 42.0             | -16.2                                     | -19.6            | -26.6                       | -24.0            | 97.0                        | 54.4             | 34.2                 | 482.1            | 0.2                           | 1.6              | 0.21                  | 17.2             |
| Cyprus         | 68.2                        | 66.7             | -                                         | -                | -                           | -                | -                           | -                | 301.3                | 8763.2           | 2.1                           | 28.4             | 0.20                  | 0.9              |
| Czechia        | 49.7                        | 62.2             | -20.2                                     | -33.7            | -19.2                       | -23.5            | 33.1                        | 18.7             | -                    | -                | -                             | -                | 0.64                  | 1.7              |
| Denmark        | 58.6                        | 56.1             | -6.0                                      | -11.8            | -25.5                       | -32.9            | 138.3                       | 77.9             | 350.5                | 5658.2           | 2.0                           | 18.3             | 0.21                  | 1.7              |
| Estonia        | 46.7                        | 44.5             | -13.5                                     | -14.3            | -14.8                       | -21.5            | 79.1                        | 29.9             | 121.2                | 1021.3           | 0.7                           | 3.3              | 0.10                  | 0.3              |
| Finland        | 46.6                        | 46.6             | -18.4                                     | -16.6            | -34.0                       | -38.5            | 121.3                       | 64.2             | 96.9                 | 873.6            | 0.6                           | 2.8              | 0.28                  | 0.2              |
| France         | 66.9                        | 62.2             | -35.4                                     | -31.8            | -38.1                       | -27.1            | 27.7                        | 19.0             | -                    | -                | 0.8                           | 4.2              | -                     | -                |
| Germany        | 60.8                        | 70.1             | -22.2                                     | -31.7            | -26.7                       | -30.6            | 63.4                        | 45.0             | 120.9                | 639.9            | -                             | -                | 2.48                  | 7.9              |
| Greece         | 60.6                        | 72.3             | -24.2                                     | -31.9            | -26.5                       | -34.2            | 57.1                        | 48.5             | 71.1                 | 926.0            | 0.5                           | 3.1              | 0.27                  | 15.5             |
| Hungary        | 61.1                        | 62.1             | -16.3                                     | -18.9            | -24.4                       | -22.7            | 37.1                        | 27.9             | 39.7                 | 542.4            | 0.2                           | 1.8              | 0.33                  | 0.7              |
| Iceland        | 43.6                        | 45.8             | -                                         | -                | -                           | -                | -                           | -                | 243.2                | 846.9            | 1.4                           | 3.1              | 0.25                  | 0.2              |
| Ireland        | 63.1                        | 74.7             | -42.5                                     | -36.7            | -40.8                       | -51.2            | 10.2                        | 23.4             | 147.9                | 810.0            | 1.0                           | 3.0              | -                     | -                |
| Italy          | 68.1                        | 72.7             | -38.0                                     | -27.7            | -42.6                       | -33.2            | 5.3                         | 11.1             | 126.4                | 1037.8           | 0.7                           | 3.4              | 1.44                  | 28.8             |
| Latvia         | 54.4                        | 51.1             | -9.0                                      | -20.6            | -15.3                       | -28.2            | 68.2                        | 39.8             | 121.3                | 1370.1           | 0.7                           | 4.4              | 0.12                  | 0.4              |
| Lithuania      | 51.6                        | 53.8             | -26.6                                     | -37.0            | -22.8                       | -27.7            | 95.7                        | 45.6             | 198.3                | 1214.8           | 1.3                           | 3.9              | 0.10                  | 0.2              |
| Luxembourg     | 47.9                        | 54.8             | -37.6                                     | -30.3            | -33.2                       | -24.3            | 37.3                        | 19.3             | 918.2                | 3956.4           | 5.3                           | 12.8             | 0.07                  | 0.4              |
| Malta          | 58.2                        | 54.9             | -27.6                                     | -17.6            | -23.9                       | -17.3            | 10.7                        | 2.9              | 369.9                | 1826.3           | 2.1                           | 5.9              | 0.24                  | 0.6              |
| Netherlands    | 56.9                        | 68.0             | -17.4                                     | -28.9            | -39.9                       | -44.2            | 81.9                        | 53.9             | 77.6                 | 527.0            | -                             | -                | 1.32                  | 6.4              |
| Norway         | 51.9                        | 57.0             | -10.9                                     | -15.4            | -24.9                       | -37.9            | 94.5                        | 36.3             | 121.3                | 996.1            | 0.8                           | 3.3              | 0.34                  | 0.8              |
| Poland         | 58.8                        | 62.7             | -19.8                                     | -20.7            | -30.3                       | -27.5            | 50.6                        | 33.7             | 60.9                 | 381.3            | 0.5                           | 1.3              | 0.56                  | 1.8              |
| Portugal       | 68.6                        | 67.7             | -35.5                                     | -29.4            | -44.4                       | -40.5            | 4.9                         | -5.0             | 185.8                | 243.1            | 1.1                           | 3.5              | 1.52                  | 3.5              |
| Romania        | 59.6                        | 61.2             | -28.0                                     | -21.0            | -30.6                       | -25.1            | -6.5                        | -6.6             | 80.2                 | 348.8            | 0.5                           | 1.2              | 0.08                  | 0.1              |
| Slovakia       | 55.8                        | 60.3             | -26.6                                     | -30.4            | -27.6                       | -31.0            | 54.8                        | 30.9             | 55.1                 | 7208.7           | 0.3                           | 23.3             | 0.15                  | 0.7              |
| Slovenia       | 54.2                        | 61.0             | -25.2                                     | -35.0            | -23.4                       | -24.8            | 39.4                        | 21.8             | 70.2                 | 573.9            | 0.4                           | 1.9              | 0.14                  | 1.2              |
| Spain          | 65.2                        | 67.1             | -43.7                                     | -30.3            | -44.2                       | -28.0            | -6.7                        | 1.3              | 125.1                | 851.2            | -                             | -                | 7.30                  | 10.3             |
| Sweden         | 55.5                        | 63.1             | -7.5                                      | -15.9            | -24.0                       | -35.5            | 124.8                       | 55.2             | -                    | -                | 0.8                           | 3.2              | 0.46                  | 0.8              |
| Switzerland    | 52.1                        | 52.6             | -30.5                                     | -28.0            | -25.4                       | -23.8            | 41.3                        | 30.5             | 61.4                 | 837.7            | 0.7                           | 2.7              | 0.83                  | 2.7              |
| United Kingdom | 65.3                        | 70.9             | -45.5                                     | -37.8            | -44.9                       | -46.7            | 27.0                        | 27.8             | 193.5                | 2779.4           | 1.3                           | 8.6              | 3.85                  | -                |

**Table S4.** Overall deaths and SMRs (as of June 23, 2021) for COVID-19 of the 0-69 group and all ages group in 16 EU/EEA countries

| Country                     | COVID-19 deaths 0-69 and proportion of the total | SMR 0-69 | SMR all ages |
|-----------------------------|--------------------------------------------------|----------|--------------|
| Denmark                     | 296/2531 (11.7%)                                 | 0.18     | 0.27         |
| Finland                     | 134/971 (13.8%)                                  | 0.08     | 0.10         |
| France                      | 13,537/110,606 (12.2%)                           | 0.68     | 0.92         |
| Germany                     | 12,212/90,310 (13.5%)                            | 0.46     | 0.55         |
| Greece                      | 3401/12,595 (27.0%)                              | 1.04     | 0.58         |
| Hungary                     | 9758/29,971 (32.6%)                              | 3.10     | 1.97         |
| Italy                       | 18,978/126,200 (15.0%)                           | 1.00     | 1.00         |
| Netherlands                 | 1922/17,730 (10.8%)                              | 0.36     | 0.65         |
| Norway                      | 150/792 (18.9%)                                  | 0.10     | 0.10         |
| Poland                      | 21,492/74,839 (28.7%)                            | 1.74     | 1.34         |
| Portugal                    | 2223/17,079 (13.0%)                              | 0.68     | 0.85         |
| Romania                     | 13,246/32,614 (40.6%)                            | 2.16     | 1.08         |
| Spain                       | 11,948/80,467 (14.8%)                            | 0.85     | 0.96         |
| Sweden                      | 1592/14,616 (10.9%)                              | 0.57     | 0.85         |
| Switzerland                 | 949/10,331 (9.2%)                                | 0.38     | 0.77         |
| United Kingdom <sup>§</sup> | 24,542/140,277 (17.5%)                           | 1.58     | 1.56         |

<sup>§</sup> Data were available only for England and Wales in the selected age groups. Thus, we obtained the SMR (0-69 and all ages) using the population by age groups of England and Wales. Last data available refers to 28 May, 2021.
